# Supplementary material for: Singlet ground states in compounds with a [MnIII4O2]8+ core due to broken degeneration
Source: Royal Society of Chemistry journal article supplement (doi:10.1039/c6nj03845j), 2017-01-01
Supplement: c6nj03845j1.pdf [file c6nj03845j1.pdf]

## ELECTRONIC SUPPLEMENTARY INFORMATION (ESI)

### Title:

Singlet ground state in compounds with  $[\text{Mn}^{\text{III}}_4\text{O}_2]^{8+}$  core due to broken degeneracy

### Authors:

Luis Escriche-Tur, Belén Albela, Mercè Font-Bardia, Montserrat Corbella.

### Content:

|                                                                                                |    |
|------------------------------------------------------------------------------------------------|----|
| Table S1. Crystallographic data .....                                                          | S2 |
| Figure S1. Crystal structure of <b>1</b> and <b>2</b> .....                                    | S2 |
| Table S2. Selected structural parameters of <b>1</b> .....                                     | S3 |
| Table S3. Selected structural parameters of <b>2</b> .....                                     | S3 |
| Table S4. Axes lengths and elongation and rhombicity parameters .....                          | S4 |
| Figure S2. Fits of the magnetic data using different approximations .....                      | S4 |
| Figure S3. Simulated curves considering an average value between $J_2$ and $J_3$ .....         | S4 |
| Table S5. Structural parameters for $[\text{Mn}_2\text{O}_2]^{8+}$ subunits .....              | S5 |
| Table S6. Structural parameters for $[\text{Mn}_2\text{O}(\text{RCOO})_2]^{2+}$ subunits ..... | S5 |
| Table S7. Structural parameters for $[\text{Mn}_2\text{O}(\text{RCOO})]^{3+}$ subunits .....   | S5 |

**Table S1.** Crystal data and structure refinement details for compound **1**.

|                                                                        | 1·1/2EtOH·5/4CH <sub>3</sub> CN·1/4H <sub>2</sub> O                                                                     | 2·2 CH <sub>3</sub> CN*                                                                           |
|------------------------------------------------------------------------|-------------------------------------------------------------------------------------------------------------------------|---------------------------------------------------------------------------------------------------|
| Formula                                                                | C <sub>167</sub> H <sub>144.50</sub> Cl <sub>2</sub> Mn <sub>8</sub> N <sub>10.50</sub> O <sub>55.50</sub> <sup>a</sup> | C <sub>192</sub> H <sub>210</sub> Cl <sub>4</sub> Mn <sub>8</sub> N <sub>14</sub> O <sub>46</sub> |
| Fw (g/mol)                                                             | 3696.84                                                                                                                 | 4031.05                                                                                           |
| Crystal color, habit                                                   | red, prism                                                                                                              | Red, thin plate                                                                                   |
| T (K)                                                                  | 100(2)                                                                                                                  | 100                                                                                               |
| λ (Mo Kα) / Å                                                          | 0.71073                                                                                                                 | 0.71073                                                                                           |
| Crystal size (mm)                                                      | 0.62 x 0.25 x 0.23                                                                                                      | 0.23 x 0.20 x 0.03                                                                                |
| Crystal system                                                         | Triclinic                                                                                                               | Monoclinic                                                                                        |
| Space group                                                            | P1                                                                                                                      | P21/c                                                                                             |
| a / Å                                                                  | 16.254(3)                                                                                                               | 27.685(3)                                                                                         |
| b / Å                                                                  | 16.408(3)                                                                                                               | 19.1531(18)                                                                                       |
| c / Å                                                                  | 17.493(3)                                                                                                               | 18.3634(16)                                                                                       |
| α / °                                                                  | 111.443(6)                                                                                                              | 90                                                                                                |
| β / °                                                                  | 93.798(6)                                                                                                               | 91.828(3)                                                                                         |
| γ / °                                                                  | 103.048(6)                                                                                                              | 90                                                                                                |
| V / Å <sup>3</sup>                                                     | 4172.9(13)                                                                                                              | 9732.3(16)                                                                                        |
| Z                                                                      | 1                                                                                                                       | 2                                                                                                 |
| ρ <sub>calcd</sub> / g·cm <sup>-3</sup>                                | 1.471                                                                                                                   | 1.376                                                                                             |
| μ / mm <sup>-1</sup>                                                   | 0.708                                                                                                                   | 0.637                                                                                             |
| F(000)                                                                 | 1897                                                                                                                    | 4192                                                                                              |
| θ range / °                                                            | 2.21 to 26.88                                                                                                           | 2.10 to 30.72                                                                                     |
| Completeness to θ <sub>max</sub>                                       | 99.7%                                                                                                                   | 98.0%                                                                                             |
| Index ranges                                                           | h = -20 → 20<br>k = -20 → 20<br>l = -22 → 22                                                                            | h = -39 → 39<br>k = -23 → 27<br>l = -26 → 24                                                      |
| Data/restraints/parameters                                             | 34398/75/2243                                                                                                           | 29671 / 3 / 553                                                                                   |
| Goof on F <sup>2</sup>                                                 | 1.105                                                                                                                   | 1.531                                                                                             |
| R <sub>1</sub> <sup>c</sup> , ωR <sub>2</sub> <sup>d</sup> [I > 2σ(I)] | 0.0397, 0.1060                                                                                                          | 0.1949, 0.4709                                                                                    |
| R <sub>1</sub> <sup>c</sup> , ωR <sub>2</sub> <sup>d</sup> (all data)  | 0.0428, 0.1104                                                                                                          | 0.3236, 0.5161                                                                                    |

<sup>a</sup> 2 eq. of 1·1/2 EtOH·5/4 CH<sub>3</sub>CN·1/4 H<sub>2</sub>O; b 2 eq. of 2·2 CH<sub>3</sub>CN <sup>c</sup> R<sub>1</sub> =  $\sum |F_o| - |F_c| / \sum |F_o|$ ; <sup>d</sup> ωR<sub>2</sub> =  $\{\sum [\omega(F_o^2 - F_c^2)^2] / \sum [\omega(F_o^2)^2]\}^{1/2}$ , ω = 1 / [σ<sup>2</sup>(F<sub>o</sub><sup>2</sup>) + (aP)<sup>2</sup> + bP], where P = [max(F<sub>o</sub><sup>2</sup>, 0) + 2F<sub>c</sub><sup>2</sup>] / 3. \* NOTE: This structure was only isotropically refined. The crystal was poorly diffracting and could not be refined completely. Therefore, it was neither deposited in the CCDC database.

**Compound 1:**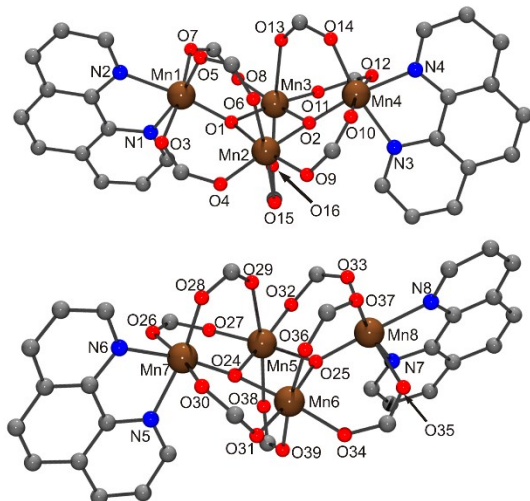**Compound 2:**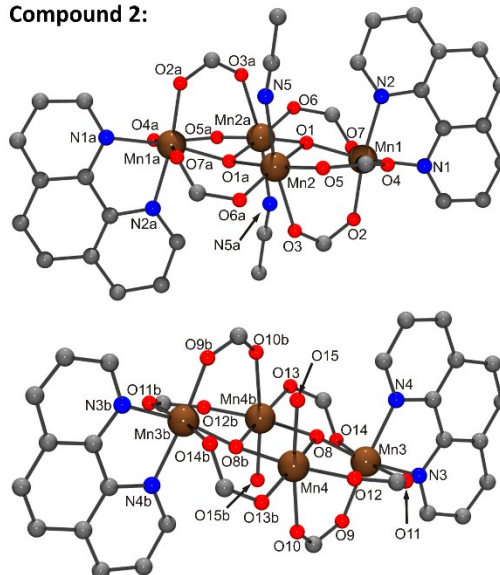

**Figure S1.** Crystal structure of the cationic complex of **1** and **2**. 4-RC<sub>6</sub>H<sub>4</sub>- groups and H atoms of phen ligands have been omitted for better clarity. Color code: Mn<sup>III</sup>, brown; C, grey; N, blue; O, red. The crystal structure of **2** could not be fully refined due to poor statistics of its measurement.

**Table S2.** Selected interatomic distances (Å) and angles (deg) for compound **1** with standard deviations in parentheses.

|                 |            |                 |            |
|-----------------|------------|-----------------|------------|
| Mn1–O1          | 1.834(3)   | Mn5–O27         | 1.944(3)   |
| Mn1–O3          | 2.144(3)   | Mn5–O24         | 1.901(3)   |
| Mn1–O5          | 1.940(3)   | Mn5–O25         | 1.904(3)   |
| Mn1–O7          | 2.124(3)   | Mn5–O38         | 2.110(4)   |
| Mn1–N1          | 2.079(4)   | Mn5–O29         | 2.174(4)   |
| Mn1–N2          | 2.061(4)   | Mn5–O32         | 1.928(3)   |
| Mn2–O1          | 1.909(3)   | Mn6–O24         | 1.898(3)   |
| Mn2–O2          | 1.908(3)   | Mn6–O34         | 1.932(3)   |
| Mn2–O4          | 1.961(3)   | Mn6–O25         | 1.901(3)   |
| Mn2–O6          | 2.171(3)   | Mn6–O31         | 1.968(3)   |
| Mn2–O9          | 1.962(3)   | Mn6–O36         | 2.204(3)   |
| Mn2–O15         | 2.147(3)   | Mn6–O39         | 2.246(3)   |
| Mn3–O1          | 1.898(3)   | Mn7–N5          | 2.083(3)   |
| Mn3–O2          | 1.897(3)   | Mn7–O24         | 1.834(3)   |
| Mn3–O8          | 1.966(3)   | Mn7–O26         | 2.194(3)   |
| Mn3–O11         | 1.946(3)   | Mn7–O28         | 1.939(3)   |
| Mn3–O13         | 2.213(4)   | Mn7–N6          | 2.064(4)   |
| Mn3–O16         | 2.201(4)   | Mn7–O30         | 2.141(3)   |
| Mn4–O2          | 1.833(3)   | Mn8–O33         | 2.181(3)   |
| Mn4–O10         | 2.145(3)   | Mn8–O35         | 2.178(3)   |
| Mn4–O12         | 2.153(3)   | Mn8–O37         | 1.911(3)   |
| Mn4–O14         | 1.942(4)   | Mn8–N7          | 2.070(5)   |
| Mn4–N3          | 2.093(4)   | Mn8–N8          | 2.076(3)   |
| Mn4–N4          | 2.050(4)   | Mn8–O25         | 1.846(3)   |
| Mn2…Mn3         | 2.860(1)   | Mn5…Mn6         | 2.839(1)   |
| Mn1…Mn2         | 3.309(1)   | Mn5…Mn7         | 3.284(1)   |
| Mn1…Mn3         | 3.362(1)   | Mn6…Mn7         | 3.409(1)   |
| Mn2…Mn4         | 3.355(1)   | Mn5…Mn8         | 3.381(1)   |
| Mn3…Mn4         | 3.303(1)   | Mn6…Mn8         | 3.332(1)   |
| Mn1…Mn4         | 5.525(1)   | Mn7…Mn8         | 5.693(1)   |
| O1–Mn1–N2       | 170.47(17) | O24–Mn5–O32     | 171.56(14) |
| O3–Mn1–O7       | 172.02(13) | O25–Mn5–O27     | 173.00(15) |
| O5–Mn1–N1       | 169.47(14) | O29–Mn5–O38     | 173.55(13) |
| O6–Mn2–O15      | 176.65(13) | O25–Mn6–O31     | 170.50(15) |
| O1–Mn2–O9       | 172.63(14) | O36–Mn6–O39     | 172.72(12) |
| O2–Mn2–O4       | 176.14(15) | O24–Mn6–O34     | 175.16(15) |
| O1–Mn3–O11      | 174.01(15) | O24–Mn7–N6      | 168.55(17) |
| O2–Mn3–O8       | 171.57(15) | O26–Mn7–O30     | 170.92(13) |
| O13–Mn3–O16     | 176.46(13) | O28–Mn7–N5      | 170.84(14) |
| O2–Mn4–N4       | 170.18(17) | O33–Mn8–O35     | 170.25(13) |
| O10–Mn4–O12     | 170.43(13) | O37–Mn8–N7      | 169.13(17) |
| O14–Mn4–N3      | 168.83(14) | O25–Mn8–N8      | 171.81(15) |
| Mn1–O1–Mn3      | 128.51(18) | Mn6–O24–Mn7     | 132.00(18) |
| Mn1–O1–Mn2      | 124.17(16) | Mn5–O24–Mn7     | 123.10(18) |
| Mn2–O1–Mn3      | 97.38(14)  | Mn5–O24–Mn6     | 96.77(14)  |
| Mn2–O2–Mn3      | 97.47(14)  | Mn5–O25–Mn6     | 96.55(14)  |
| Mn2–O2–Mn4      | 127.50(17) | Mn5–O25–Mn8     | 128.76(19) |
| Mn3–O2–Mn4      | 124.63(19) | Mn6–O25–Mn8     | 125.58(17) |
| Mn2–O1–O2–Mn3   | 166.6(2)   | Mn5–O25–O24–Mn6 | 169.2(2)   |
| Mn1–Mn3…Mn2–O1  | 15.5(1)    | Mn8…Mn6…Mn5–O25 | 14.7(1)    |
| Mn4–Mn2…Mn3–O2  | 15.9(1)    | Mn7…Mn5…Mn6–O24 | 13.9(1)    |
| O15–Mn2…Mn1–O7  | 85.5(1)    | O33–Mn8…Mn6–O39 | 89.8(1)    |
| O16–Mn3…Mn4–O10 | 82.6(1)    | O38–Mn5…Mn7–O30 | 91.7(1)    |

**Table S3.** Selected interatomic distances (Å) and angles (deg) for compound **2** with standard deviations in parentheses. **NOTE:** The crystal structure of **2** could not be completely refined due to poor quality of the crystallographic data. The following structural parameters should **never** be used for magneto-structural correlations, neither as precise values.

|                 |          |                 |          |
|-----------------|----------|-----------------|----------|
| Mn1–O1          | 1.870(6) | Mn3–N4          | 2.043(8) |
| Mn1–O2          | 1.912(6) | Mn3–O9          | 1.923(6) |
| Mn1–O4          | 2.142(7) | Mn3–O11         | 2.083(6) |
| Mn1–O7          | 2.208(6) | Mn3–O8          | 1.855(6) |
| Mn1–N1          | 2.039(8) | Mn3–N3          | 2.037(8) |
| Mn1–N2          | 2.036(8) | Mn3–O14         | 2.219(6) |
| Mn2–O1          | 1.860(6) | Mn4–O8b         | 1.919(6) |
| Mn2–O3          | 2.162(6) | Mn4–O15         | 2.216(6) |
| Mn2–O5          | 1.945(7) | Mn4–O12         | 1.936(6) |
| Mn2–N5          | 2.355(8) | Mn4–O8          | 1.890(6) |
| Mn2–O1a         | 1.919(6) | Mn4–O13b        | 1.935(6) |
| Mn2–O6a         | 1.913(6) | Mn4–O10         | 2.143(6) |
| O1–Mn1–N1       | 169.7(3) | O8–Mn3–N3       | 168.6(3) |
| O4–Mn1–O7       | 168.0(3) | O9–Mn3–N4       | 170.2(3) |
| O2–Mn1–N2       | 171.2(3) | O11–Mn3–O14     | 170.9(2) |
| O1–Mn2–O6a      | 171.6(3) | O8–Mn4–O13b     | 171.7(2) |
| O3–Mn2–N5       | 169.5(3) | O10–Mn4–O15     | 171.2(2) |
| O1a–Mn2–O5      | 175.7(3) | O8b–Mn4–O12     | 173.2(2) |
| Mn1–O1–Mn2      | 122.0(3) | Mn3–O8–Mn4      | 120.4(3) |
| Mn1–O1–Mn2a     | 125.7(3) | Mn3–O8–Mn4b     | 125.9(3) |
| Mn2–O1–Mn2a     | 98.8(3)  | Mn4–O8–Mn4b     | 98.7(3)  |
| Mn2–O1–O1a–Mn2a | 180      | Mn4–O8–O8b–Mn4b | 180      |
| Mn1–Mn2–Mn2a–O1 | 18.9(3)  | Mn3–Mn4–Mn4b–O8 | 19.8(3)  |
| N5–Mn2–Mn1–O7   | 98.1(2)  | O15–Mn4–Mn3–O14 | 97.5(2)  |

Symmetry codes: (a)  $1-x, 1-y, -z$ ; (b)  $-x, 1-y, 1-z$ .

**Table S4**  $x$ ,  $y$ , and  $z$  axes length and the elongated ( $\Delta$ ) and rhombic distortion ( $\rho$ ) of each Mn ion for compounds **1** and **2**.

| Compound  | Mn centre | $x / \text{Å}$ | $y / \text{Å}$ | $z / \text{Å}$ | $\Delta / \%$ | $\rho / \%$ |
|-----------|-----------|----------------|----------------|----------------|---------------|-------------|
| <b>1</b>  | Mn1       | 3.895          | 4.019          | 4.267          | 7.8           | 3.2         |
|           | Mn2       | 3.87           | 3.87           | 4.319          | 11.6          | 0.0         |
|           | Mn3       | 3.862          | 3.843          | 4.414          | 14.6          | -0.5        |
|           | Mn4       | 3.883          | 4.035          | 4.297          | 8.5           | 3.9         |
|           | Mn5       | 3.827          | 3.846          | 4.283          | 11.6          | 0.5         |
|           | Mn6       | 3.83           | 3.868          | 4.449          | 15.6          | 1.0         |
|           | Mn7       | 3.898          | 4.021          | 4.334          | 9.5           | 3.2         |
|           | Mn8       | 3.923          | 3.98           | 4.36           | 10.3          | 1.5         |
| <b>2*</b> | Mn1       | ~3.90          | ~3.95          | ~4.34          | ~11           | ~1          |
|           | Mn2       | ~3.78          | ~3.85          | ~4.50          | ~18           | ~2          |
|           | Mn3       | ~3.90          | ~3.96          | ~4.31          | ~10           | ~2          |
|           | Mn4       | ~3.83          | ~3.85          | ~4.36          | ~14           | ~1          |

$\Delta = (z - \bar{xy}) / \bar{xy}$ ,  $\bar{xy} = (x + y) / 2$ ;  $\rho = (y - x) / x$ . \* The Crystal structure of **2** could not be fully refined due to poor statistics of its measurement.

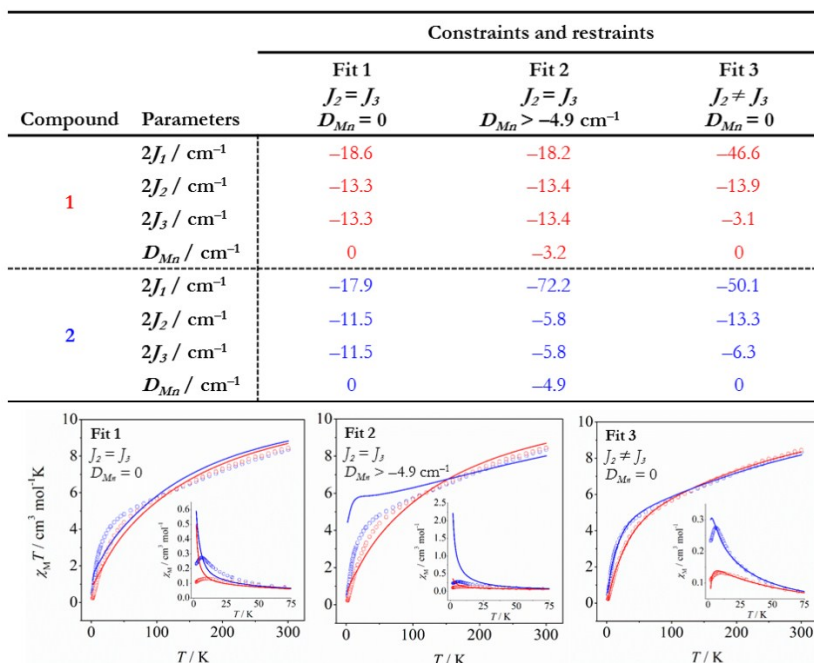

**Figure S2.** Results from different fits of the  $\chi_M T$  versus  $T$  plots of compounds **1** (red) and **2** (blue). The solid lines correspond to the fit to the experimental data considering  $J_2 = J_3$ , omitting or including  $D_{Mn}$  (Fit 1 and 2, respectively), and considering  $J_2 \neq J_3$  (Fit 3). The molecular weight of **2** was referred to one  $\text{Mn}_4$  unit, considering an average formula between the two entities.

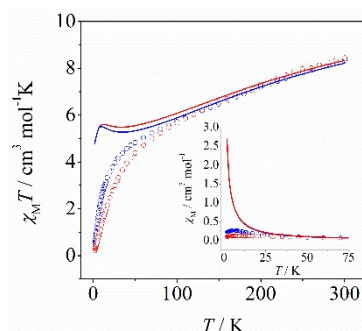

**Figure S3.** Experimental (open circles) and simulated (straight lines)  $\chi_M T$  versus  $T$  and  $\chi_M$  versus  $T$  (inset) plots for compounds **1** (red) and **2** (blue). The simulation was performed with  $2J_1$  and  $D_{Mn}$  values obtained from the fit and with the average value between  $2J_2$  and  $2J_3$  ( $-9.7 \text{ cm}^{-1}$  for **1** and  $-11.5 \text{ cm}^{-1}$  for **2**). The molecular weight of **2** was referred to one  $\text{Mn}_4$  unit, considering an average formula between the two entities.

**Table S5.** Comparison of the average core parameters, distances ( $\text{\AA}$ ) and angles (deg), for the  $[\text{Mn}^{\text{III}}_2\text{O}_2]^{8+}$  subunits of the several  $[\text{Mn}^{\text{III}}_4\text{O}_2]^{8+}$  compounds.

| Compound                                                                       | $\text{Mn}_c \cdots \text{Mn}_c$ | $\text{Mn}_c - \text{O}_b - \text{Mn}_c$ | $\text{Mn}_c - \text{O}_b - \text{O}_b - \text{Mn}_c$ | $2J_1 / \text{cm}^{-1}$ | Ref.      |
|--------------------------------------------------------------------------------|----------------------------------|------------------------------------------|-------------------------------------------------------|-------------------------|-----------|
| <b>1</b>                                                                       | 2.849                            | 97.1                                     | 168                                                   | -45.5                   | This work |
| <b>2*</b>                                                                      | $\sim 2.88$                      | $\sim 99$                                | 180                                                   | -43.0                   | This work |
| $[\text{Mn}_4\text{O}_2(\text{NO}_3)(\text{O}_2\text{Cet})_6(\text{bpy})_2]^+$ | 2.847                            | 97.2                                     | 169                                                   | -33.0                   | 1         |
| $[\text{Mn}_4\text{O}_2(\text{O}_2\text{Cet})_7(\text{bpy})_2]^+$              | 2.871                            | 97.2                                     | 170                                                   | -51.4                   | 2         |
| $[\text{Mn}_4\text{O}_2(\text{O}_2\text{CMe})_7(\text{bpy})_2]^+$              | 2.848                            | 96.3                                     | 167                                                   | -47.0                   | 3         |
| $[\text{Mn}_4\text{O}_2(\text{O}_2\text{CMe})_7(\text{pic})_2]^-$              | 2.842                            | 96.6                                     | 165                                                   | -49.2                   | 4         |
| $[\text{Mn}_4\text{O}_2(\text{py})_2(\text{O}_2\text{CMe})_6(\text{dbm})_2]$   | 2.875                            | 99.1                                     | 180                                                   | -29.8                   | 5         |
| $[\text{Mn}_4\text{O}_2(\text{O}_2\text{CPh})_6(\text{dpm})_2]$                | 2.841                            | 98.5                                     | 179                                                   | -55.0                   | 6         |

Abbreviations: bpya = bis(2-pyridyl)amine, bpy = 2,2'-bipyridine, pic = picolinate, py = pyridine, dbmH = dibenzoylmethane, dpmH = dipivaloylmethane; see Eq. 1 and Figure 5 for the  $J$  assignment. \* The crystal structure of **2** could not be fully refined due to poor statistics of its measurement.

**Table S6.** Comparison of the average core parameters, distances (Å) and angles (deg), for the  $[\text{Mn}_2\text{O}(\text{RCOO})_2]^{2+}$  subunits of the several  $[\text{Mn}^{\text{III}}_4\text{O}_2]$  compounds.

| Compound                                                                       | $\text{Mn}_c \cdots \text{Mn}_t$ | $\text{Mn}_c - \text{O}_b - \text{Mn}_t$ | $\text{L} - \text{Mn}_c \cdots \text{Mn}_t - \text{L}$ | $2J_2 / \text{cm}^{-1}$ | Ref.      |
|--------------------------------------------------------------------------------|----------------------------------|------------------------------------------|--------------------------------------------------------|-------------------------|-----------|
| <b>1</b>                                                                       | 3.307                            | 124.4                                    | 87.4                                                   | -15.1/-4.4              | This work |
| <b>2*</b>                                                                      | ~3.26                            | ~121                                     | ~99                                                    | -14.7/-8.2              | This work |
| $[\text{Mn}_4\text{O}_2(\text{NO}_3)(\text{O}_2\text{CET})_6(\text{bpy})_2]^+$ | 3.258                            | 121.8                                    | 74.1                                                   | -3.4                    | 1         |
| $[\text{Mn}_4\text{O}_2(\text{O}_2\text{CET})_7(\text{bpya})_2]^+$             | 3.307                            | 126.1                                    | 92.6                                                   | -6.6                    | 2         |
| $[\text{Mn}_4\text{O}_2(\text{O}_2\text{CMe})_7(\text{bpy})_2]^+$              | 3.301                            | 123.7                                    | 82.5                                                   | -15.6                   | 3         |
| $[\text{Mn}_4\text{O}_2(\text{O}_2\text{CMe})_7(\text{pic})_2]^-$              | 3.311                            | 125.0                                    | 82.3                                                   | -10.6                   | 4         |
| $[\text{Mn}_4\text{O}_2(\text{py})_2(\text{O}_2\text{CMe})_6(\text{dbm})_2]$   | 3.308                            | 123.2                                    | 105.1                                                  | -10.0                   | 5         |
| $[\text{Mn}_4\text{O}_2(\text{O}_2\text{CPh})_6(\text{dpm})_2]$                | 3.255                            | 120.1                                    | 70                                                     | -0.8                    | 6         |

$\text{L} - \text{Mn}_c \cdots \text{Mn}_t - \text{L}$  = torsion angle between the two Jahn-Teller axes. Abbreviations: bpya = bis(2-pyridyl)amine, bpy = 2,2'-bipyridine, pic = picolinate, py = pyridine, dbmH = dibenzoylmethane, dpmH = dipivaloylmethane. See Eq. 1 and Figure 5 for the  $J$  assignment. \* The crystal structure of **2** could not be fully refined due to poor statistics of its measurement.

**Table S7.** Comparison of the average core parameters, distances (Å) and angles (deg), for the  $[\text{Mn}_2\text{O}(\text{RCOO})]^{3+}$  unit of the several  $[\text{Mn}^{\text{III}}_4\text{O}_2]$  complexes.

| Compound                                                                       | $\text{Mn}_c \cdots \text{Mn}_t$ | $\text{Mn}_c - \text{O}_b - \text{Mn}_t$ | $2J_3 / \text{cm}^{-1}$ | Ref.      |
|--------------------------------------------------------------------------------|----------------------------------|------------------------------------------|-------------------------|-----------|
| <b>1</b>                                                                       | 3.377                            | 129.2                                    | -15.1/-4.4              | This work |
| <b>2*</b>                                                                      | ~3.37                            | ~126                                     | -14.7/-8.2              | This work |
| $[\text{Mn}_4\text{O}_2(\text{NO}_3)(\text{O}_2\text{CET})_6(\text{bpy})_2]^+$ | 3.34                             | 126.4                                    | -3.4                    | 1         |
| $[\text{Mn}_4\text{O}_2(\text{O}_2\text{CET})_7(\text{bpya})_2]^+$             | 3.444                            | 130.7                                    | -6.6                    | 2         |
| $[\text{Mn}_4\text{O}_2(\text{O}_2\text{CMe})_7(\text{bpy})_2]^+$              | 3.378                            | 130.2                                    | -15.6                   | 3         |
| $[\text{Mn}_4\text{O}_2(\text{O}_2\text{CMe})_7(\text{pic})_2]^-$              | 3.396                            | 129.7                                    | -10.6                   | 4         |
| $[\text{Mn}_4\text{O}_2(\text{py})_2(\text{O}_2\text{CMe})_6(\text{dbm})_2]$   | 3.398                            | 128.6                                    | -10.0                   | 5         |
| $[\text{Mn}_4\text{O}_2(\text{O}_2\text{CPh})_6(\text{dpm})_2]$                | 3.362                            | 126.0                                    | -0.8                    | 6         |

Abbreviations: bpya = bis(2-pyridyl)amine, bpy = 2,2'-bipyridine, pic = picolinate, py = pyridine, dbmH = dibenzoylmethane, dpmH = dipivaloylmethane; see Eq. 1 and Figure 5 for the  $J$  assignment. \* The crystal structure of **2** could not be fully refined due to poor statistics of its measurement.

## References for tables S5, S6, and S7

- 1 G. Aromí, S. Bhaduri, P. Artús, K. Folting and G. Christou, *Inorg. Chem.*, 2002, **41**, 805–817.
- 2 G. Aromí, S. Bhaduri, P. Artús, J. C. Huffman, D. N. Hendrickson and G. Christou, *Polyhedron*, 2002, **21**, 1779–1786.
- 3 J. B. Vincent, C. Christmas, H. R. Chang, Q. Li, P. D. W. Boyd, J. C. Huffman, D. N. Hendrickson and G. Christou, *J. Am. Chem. Soc.*, 1989, **111**, 2086–2097.
- 4 E. Libby, J. K. McCusker, E. A. Schmitt, K. Folting, D. N. Hendrickson and G. Christou, *Inorg. Chem.*, 1991, **30**, 3486–3495.
- 5 S. Wang, K. Folting, W. E. Streib, E. A. Schmitt, J. K. McCusker, D. N. Hendrickson and G. Christou, *Angew. Chem. Int. Ed. Engl.*, 1991, **30**, 305–306.
- 6 C. Cañada-Vilalta, J. C. Huffman and G. Christou, *Polyhedron*, 2001, **20**, 1785–1793.
